# Supplementary material
Source: bioRxiv or medRxiv preprint supplement (https://www.biorxiv.org/highwire/filestream/35979/field_highwire_adjunct_files/0/122812-1.pdf)
Supplement: Supplementary file [file 122812-1.pdf]

# Supplementary Figure 1 - Graphical User Interface

**A** Raspberry Pi 0.99

CAMERA: ON/OFF, Resolution: 2592x1944, White balance: auto, Mode: none, color effect: none

Window size: 560, Horiz. Offset: 50, Brightness: 50

Digi Zoom: 1, Verti. Offset: 50, Contrast: 50

Binning: 0, FPS: 15, Exposure: 0

Rotation: 0, auto expos. (checked), Flip Image (unchecked)

TIME LAPSE: video (0 sec), timelapse (INTERVAL (sec)), photo (0)

---

**B**

LED 1: ON/OFF, zap in ms, ZAP!

LED 2: ON/OFF, zap in ms, ZAP!

MATRIX: OFF, Brightness, PATTERN 1, PATTERN 2, PATTERN 3

RING: Green flash (ON/OFF, zap in ms, ZAP!), Red flash (OFF, zap in ms, ZAP!), Blue flash (OFF, zap in ms, ZAP!), all

---

**C**

PELTIER: ON/OFF, set temp(C): 30, Auto Focus: 0, exit program, QUIT

temp(C): 165.28, Log temp? (unchecked)

---

**D** Protocols

|              |     |         |     |        |      |
|--------------|-----|---------|-----|--------|------|
| LED1         | OFF | OFF     | OFF | OFF    | OFF  |
| LED2         | OFF | OFF     | OFF | OFF    | OFF  |
| Matrix       | OFF | OFF     | OFF | OFF    | OFF  |
| Ring         | OFF | OFF     | OFF | OFF    | OFF  |
| Red          | 0   | 0       | 0   | 0      | 0    |
| Green        | 0   | 0       | 0   | 0      | 0    |
| Blue         | 0   | 0       | 0   | 0      | 0    |
| Peltier      | OFF | OFF     | OFF | OFF    | OFF  |
| Pelt temp(C) | 25  | 25      | 25  | 25     | 25   |
| Dur(ms)      | 250 | 250     | 250 | 250    | 250  |
| Repetitions  | 2   | IRI(ms) | 125 |        |      |
| Camera       | OFF |         |     | to AVI | RUN! |
